# Supplementary material for: Palmitic acid-capped MIL-101-Al as a nano-adjuvant to amplify immune responses against Pseudomonas aeruginosa
Source: Royal Society of Chemistry journal article supplement (doi:10.1039/d4nr01180e), 2024-01-01
Supplement: d4nr01180e1.pdf [file d4nr01180e1.pdf]

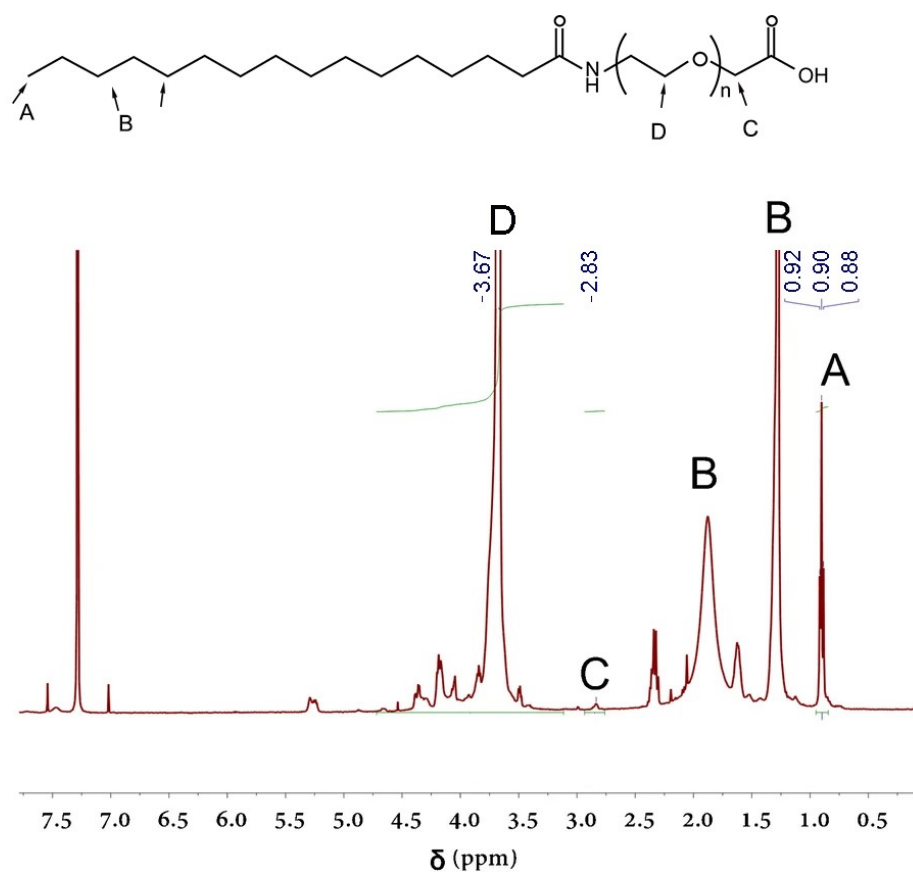

Figure S1. The typical  $^1\text{H-NMR}$  signals from PAA.

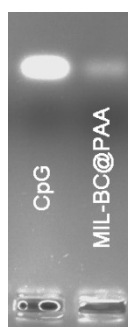

Figure S2. Loading capacity of CpG for MIL-BC@PAA was measured by agarose gel electrophoresis.

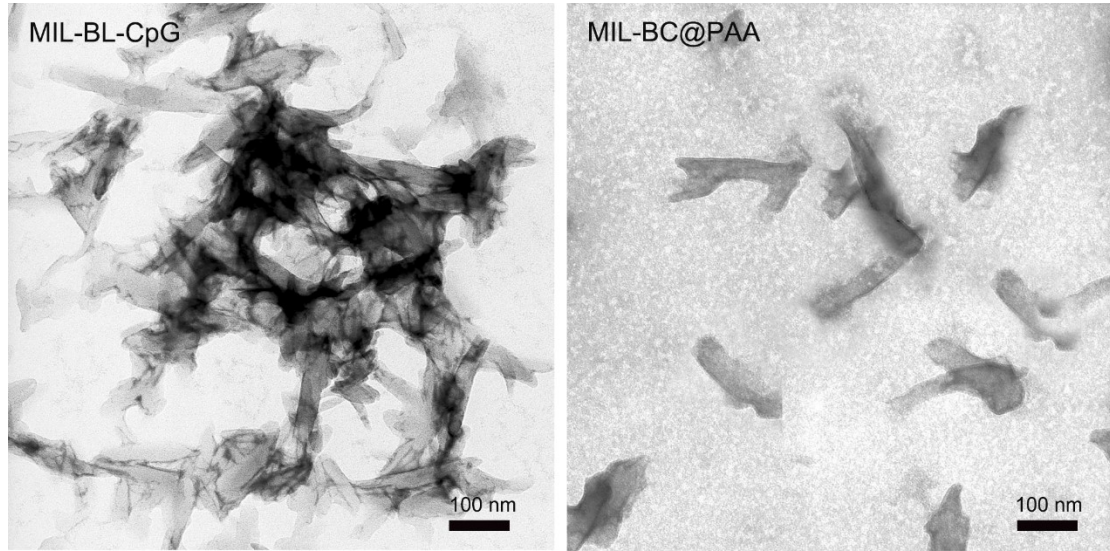

Figure S3. The TEM images of MIL-BL-CpG and MIL-BC@PAA after stored in PBS (pH 7.4) for 30 days.

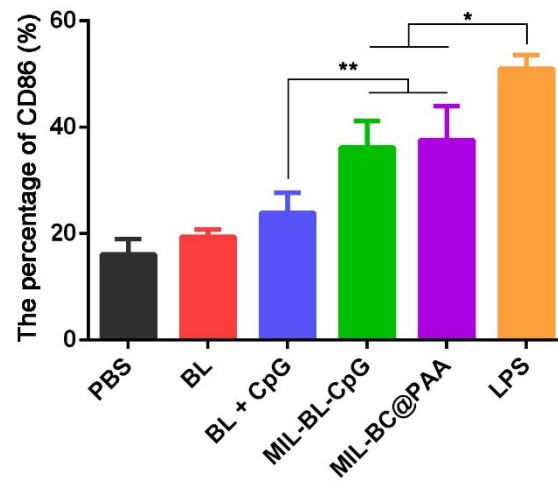

Figure S4. The expression of CD86 on nanovaccines stimulated BMDCs. Data are presented as mean  $\pm$  SD (n = 4). \*p < 0.05 and \*\*p < 0.01.

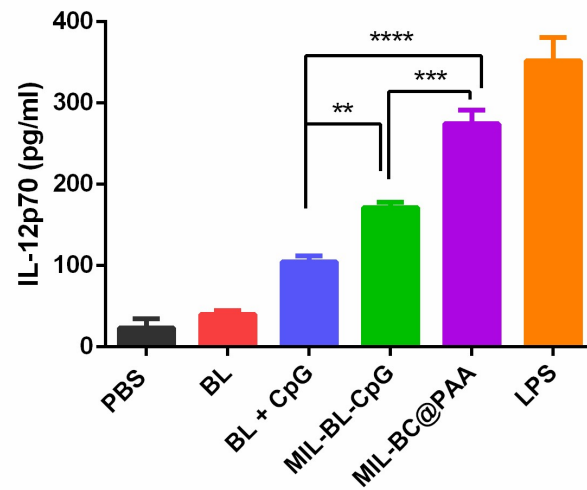

Figure S5. The production of IL-12p70 from supernatants of nanovaccines stimulated BMDC detected by ELISA. Data are presented as mean  $\pm$  SD (n = 4). \*\*P < 0.01, \*\*\*P < 0.001.

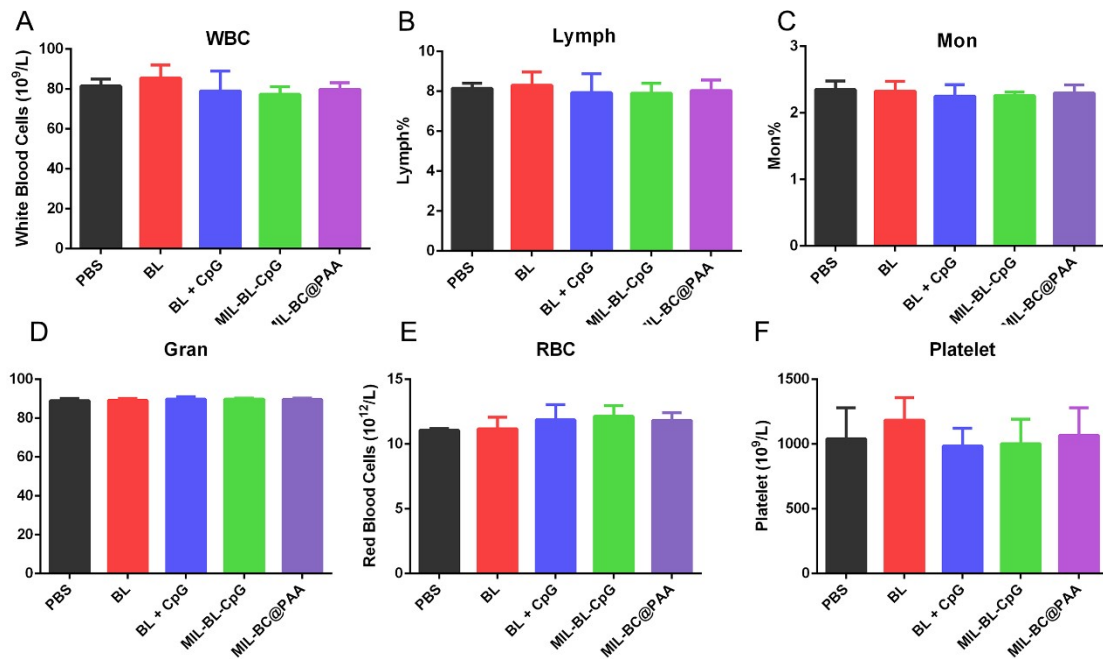

Figure S6. Routine analysis of blood. The level of WBC, Lymph, Mon, Gran, RBC, and Platelet in whole blood were tested by blood routine analyzer. (n=4).

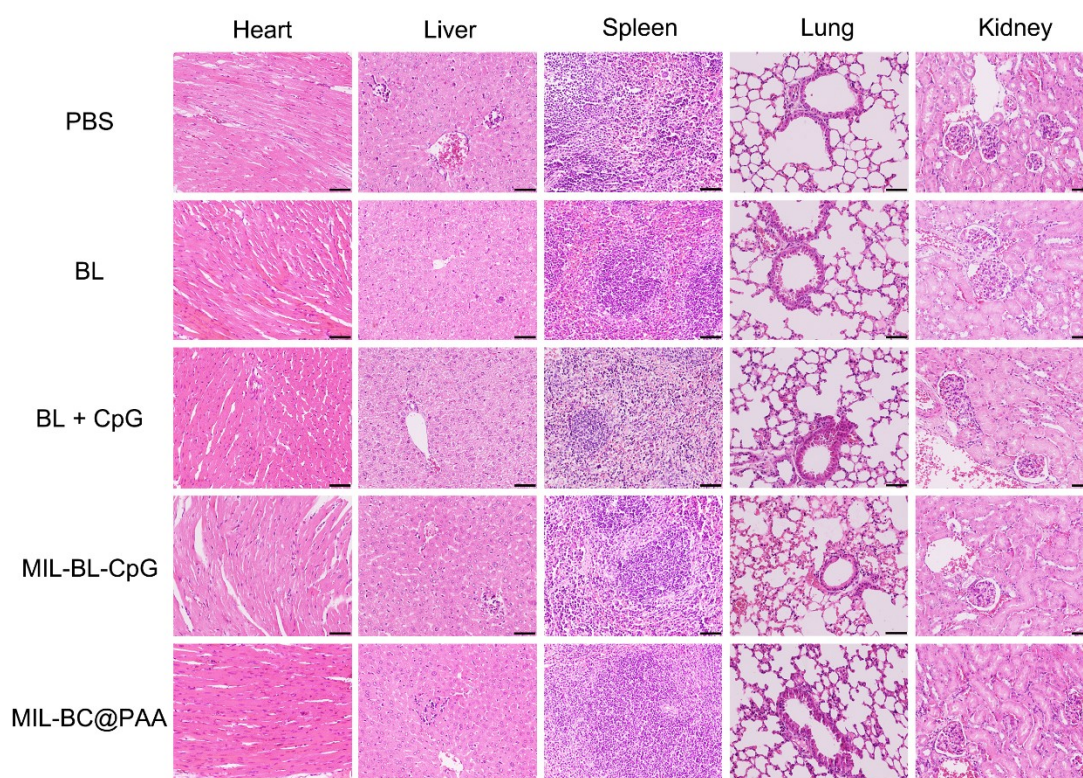

Figure S7. H&E staining of hearts, livers, spleens, lungs and kidneys. 40 × magnification. Scale bar, 50  $\mu$ m.

Table 1. Size, PDI and zeta potential of MIL, MIL-BL-CpG and MIL-BC@PAA.

| Group      | Size (nm)        | PDI  | Zeta (mV)         |
|------------|------------------|------|-------------------|
| MIL        | 103.5 $\pm$ 20.7 | 0.65 | +20.25 $\pm$ 4.5  |
| MIL-BL-CpG | 117.4 $\pm$ 15.3 | 0.58 | + 12.05 $\pm$ 3.1 |
| MIL-BC@PAA | 119.2 $\pm$ 3.7  | 0.31 | -5.9 $\pm$ 5.4    |
